# Supplementary material
Source: PubMed Central journal article supplement (PMC4204674)

## SUPPLEMENTARY DATA

Table S1 Primer sequences used for quantitative real-time PCR.

| Gene                | Forward primer (5'-3')    | Reverse primer (5'-3')     |
|---------------------|---------------------------|----------------------------|
| <i>GmSPX1</i> -RT   | CCAAACGAGGAAGCAACACAATG   | TTCTGGATGAACGGCAAACGC      |
| <i>GmSPX2</i> -RT   | TTGATTCAAACGCGGAGT        | AAGACCAGTCGTTGGTG          |
| <i>GmSPX3</i> -RT   | ACTATAGTGCCCTTAACTACATAGG | AAGCATCACATCCCTCCTCA       |
| <i>GmSPX4</i> -RT   | GCTTAACCACTTCCTTCGCCT     | CACTAATTGAAGGCCAGTCATTGTT  |
| <i>GmSPX5</i> -RT   | GCAGACGCTGCCTGATTGGCG     | TGAATTCACAGCTTCTACAACCTCTG |
| <i>GmSPX6</i> -RT   | TCAATCACTACCGCCATCACT     | ACTAGTCCTGCAAAGTTTAATGAAC  |
| <i>GmSPX7</i> -RT   | GCAAACGCCTCAAGTCCGAC      | TCTCTTCACTTGAATCCTTAACTTTG |
| <i>GmSPX8</i> -RT   | CAAGCGCTCAAGACCGAC        | TTCATCATCTCTTCCCGCGA       |
| <i>GmSPX9</i> -RT   | CGAAGATGGCCAAGCTCTGC      | GAAGGGCTGGTTCACCACAGA      |
| <i>GmPT2</i> -RT    | GACATAGCGCGAAATCTGTC      | CAAACACGGCCGCAATGAAG       |
| <i>GmPT7</i> -RT    | TGACCACAAGTACGATCTTCC     | CGCCAATAGTAGGTAAGAGCA      |
| <i>GmHAD1-6</i> -RT | GTGACAACCTGGGTCGTCGATGAT  | CAGGTATAACTCTGGGGTGCAAG    |
| <i>GmALMT1</i> -RT  | GAGCACTTACTCGGGAATGTG     | GGACTTTGGCAGTTG ATGGG      |
| <i>GmPAP21</i> -RT  | GCTGATGGTGTTTGGATTG       | TGTTGGGTGTCAAAGTTGAG       |
| <i>GmIPS1</i> -RT   | TGATAGTACCGGATTATCAAGG    | CTGATAGGCATAGTTTGCAG       |
| <i>GmRNS1</i> -RT   | CATCTGGGATTTCTGATCTCAC    | TTGTAAGAGCTTGGAGGAGG       |
| <i>TefS1</i> -RT    | TGCAAAGGAGGCTGCTAACT      | TGCAAAGGAGGCTGCTAACT       |

Table S2 Primer sequences used for transient expression and *GmSPX3* over-expression.

| Gene               | Forward primer (5'-3')     | Reverse primer (5'-3')     |
|--------------------|----------------------------|----------------------------|
| <i>GmSPX1</i> -GFP | TCTAGAGATGAAGTTTGGGAAGAG   | GGATCCCGGACAATAGGAACTGCAGC |
| <i>GmSPX2</i> -GFP | TCTAGAGATGAAGTTCTGGAAGATC  | GGATCCCGGTTATGCAAAGGAGGC   |
| <i>GmSPX3</i> -GFP | TCTAGAGATGAAATTCGGAAAGAG   | GGATCCCGCTTGGCTGTTTGTTC    |
| <i>GmSPX4</i> -GFP | TCTAGAGATGAAGTTCTGGAAGATC  | GGATCCCGGTTATGCAAAGGAGGCA  |
| <i>GmSPX5</i> -GFP | TCTAGAGATGAAGTTTGAGAAGATCC | GGATCCCGGTTGTGTGGAGAAGATGG |
| <i>GmSPX6</i> -GFP | GGTACCGATGAAATTTGGGAAAGAG  | GGATCCCGCACAGAATCAGTTTCCT  |
| <i>GmSPX7</i> -GFP | TCTAGAGATGAAATTCGGAAAGAGC  | GGATCCCGCTTGGCTGTTTGTTC    |
| <i>GmSPX8</i> -GFP | TCTAGAGATGAAATTCGGGAAGAG   | GGATCCCGCTTGGCTGCTTGTTC    |
| <i>GmSPX9</i> -GFP | TCTAGAGATGAAGTTTGACAAGAT   | GGATCCCGGTTGCTTTCTCTAG     |
| <i>GmSPX3</i> -OX  | TCTAGAATGAAGTTTGGGAAGAG    | TCTAGATTACTTGGCTGTTTGTTC   |



Fig. S2. Expression of *GmSPX3* in transgenic soybean hairy roots. Soybean composite plants were grown in nutrient solution containing 500  $\mu\text{M}$  (+P) phosphorus for 21 d. Transcripts of *GmSPX3* in hairy roots were determined by qPCR analysis. CK represents soybean hairy roots transformed with the empty vector; OX means transgenic soybean hairy roots with overexpressing *GmSPX3*. Each bar is the mean of four replicates with standard error. Asterisks indicate significant differences in *GmSPX3* expression between OX and CK. \*\*\*,  $P < 0.001$ .

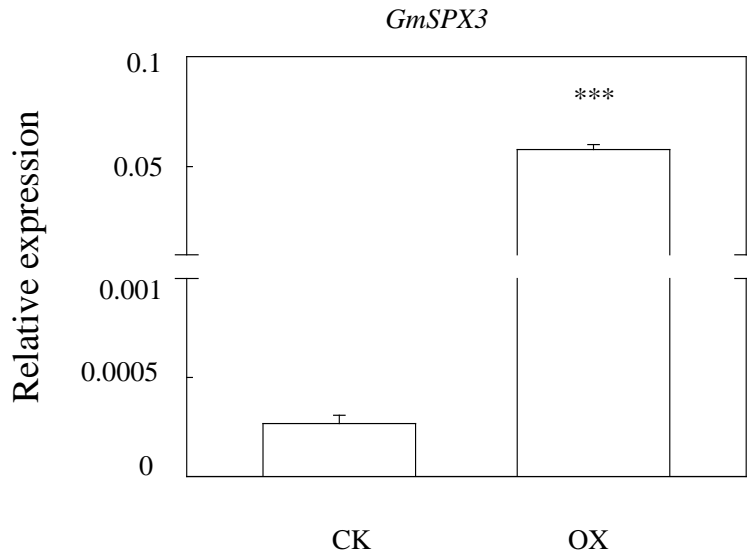

Supplement: supp_mcu147_mcu147supp.pdf [file supp_mcu147_mcu147supp.pdf]
